# Supplementary material for: Colorimetric Assay Reports on Acyl Carrier Protein Interactions
Source: PubMed Central journal article supplement (PMC6821831; doi:10.1038/s41598-019-51554-6), 2019-10-30
Supplement: 41598_2019_51554_MOESM1_ESM.pdf [file 41598_2019_51554_MOESM1_ESM.pdf]

# Supporting Information

## Colorimetric Assay Reports on Acyl Carrier Protein Interactions

Kofi K. Acheampong,<sup>1</sup> Bashkim Kokona<sup>1</sup> Gabriel A. Braun,<sup>1</sup> Danielle R. Jacobsen,<sup>2</sup> Karl A. Johnson,<sup>2,\*</sup> Louise K. Charkoudian<sup>1,\*</sup>

<sup>1</sup>Department of Chemistry, Haverford College, Haverford, PA 19041-1391, USA

<sup>2</sup>Department of Biology, Haverford College, Haverford, PA 19041-1391, USA

\*Correspondence and requests for materials should be addressed to K.A.J. ([kjohnson@haverford.edu](mailto:kjohnson@haverford.edu)) and L.K.C. ([lcharkou@haverford.edu](mailto:lcharkou@haverford.edu))

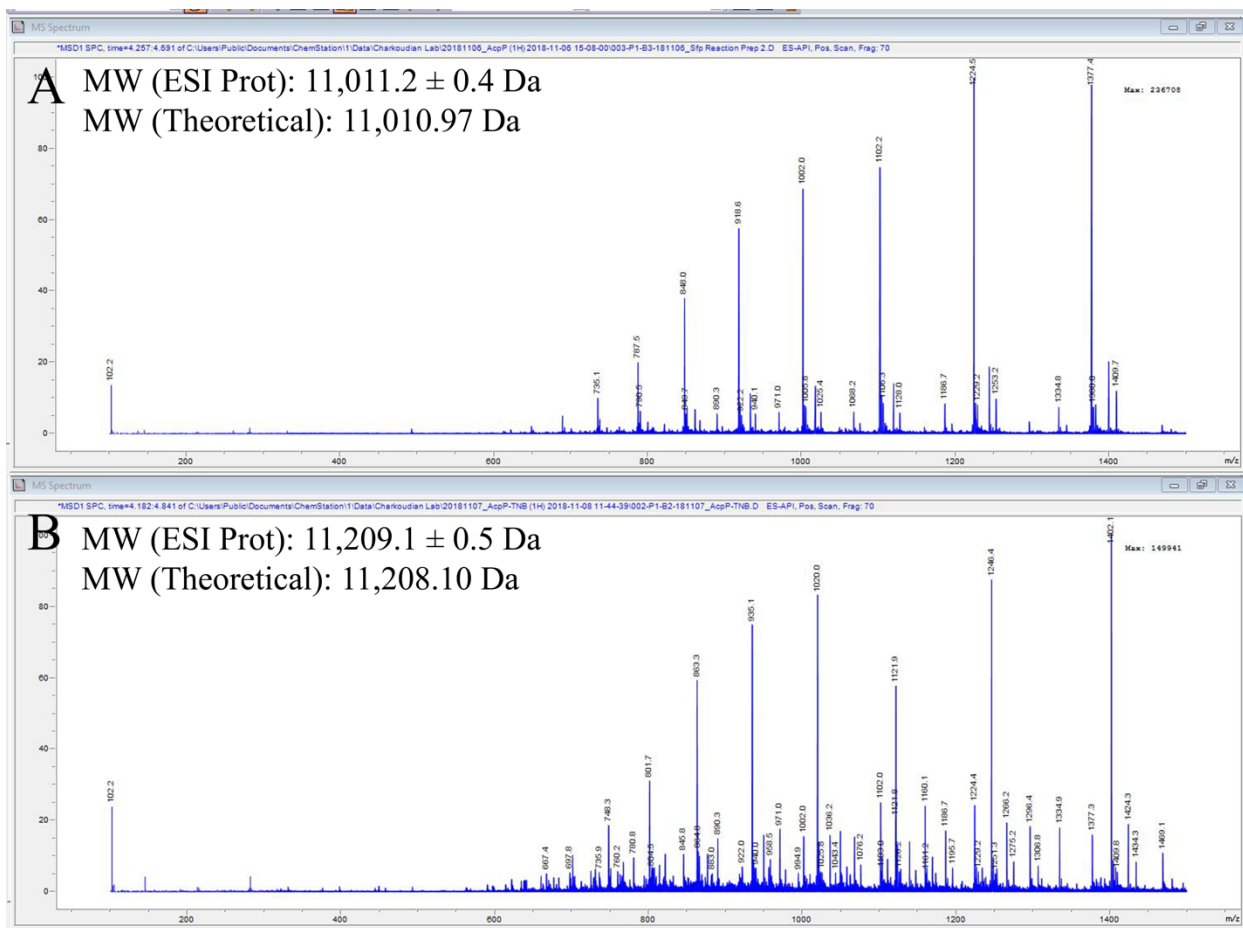

**Figure S1.** ES mass spectrum of *holo*-AcpP (A) and AcpP-TNB<sup>-</sup> (B). The different charge states (*z*) are marked on the plot and are calculated according to the theoretical molecular weight of the ACP (minus the *N*-terminus methionine). The addition of + 197.9 Da is consistent with the loading of TNB<sup>-</sup> onto the ACP Ppant arm.

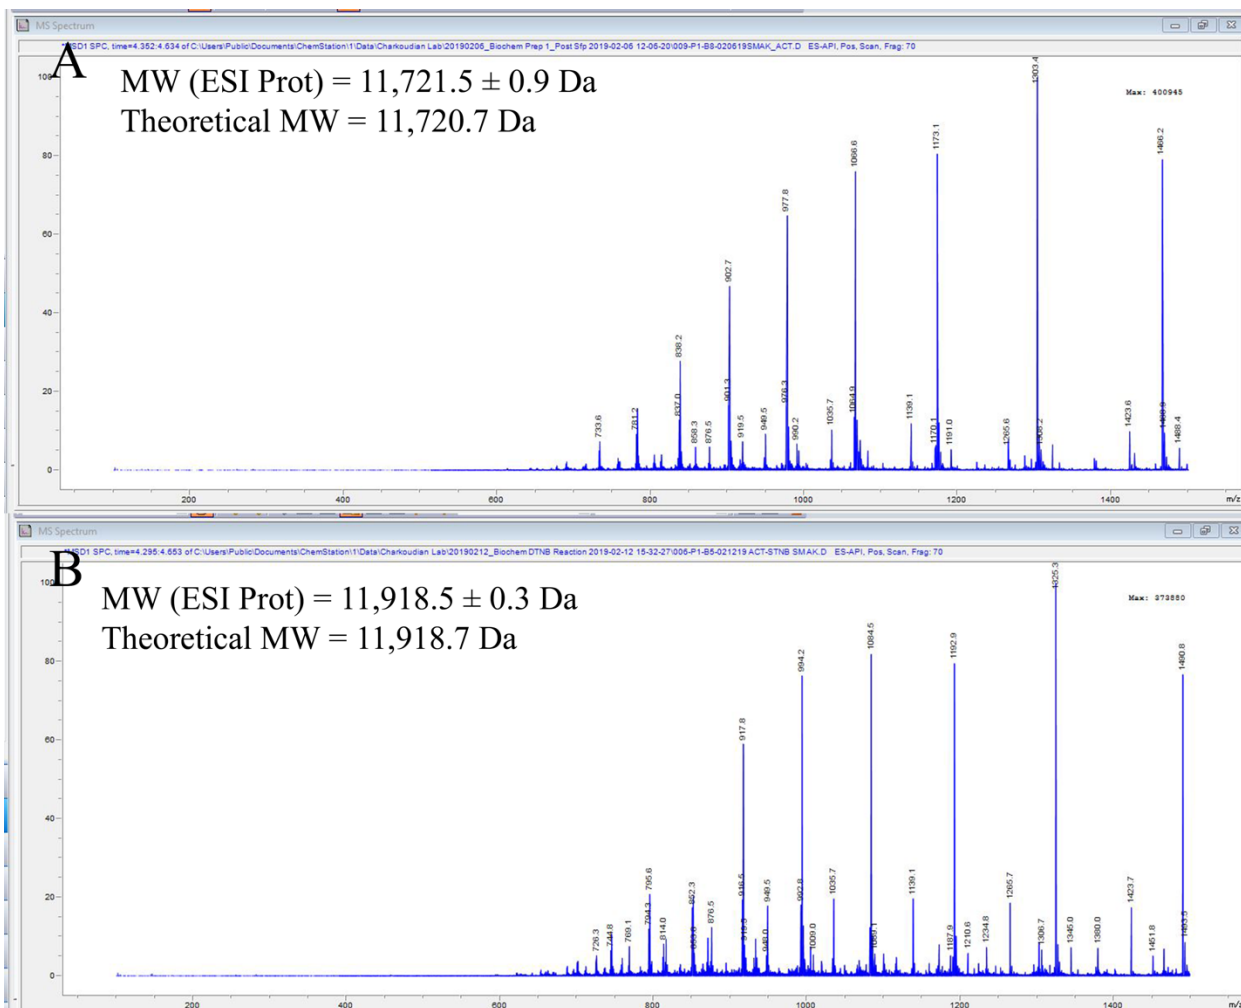

**Figure S2.** ES mass spectrum of *holo*- C17S ACT ACP (A) and ACT ACP-TNB<sup>-</sup> (B). The different charge states (*z*) are marked on the plot and are calculated according to the theoretical molecular weight of the ACP (minus the *N*-terminus methionine). The addition of + 197.9 Da is consistent with the loading of TNB<sup>-</sup> onto the ACP Ppant arm.

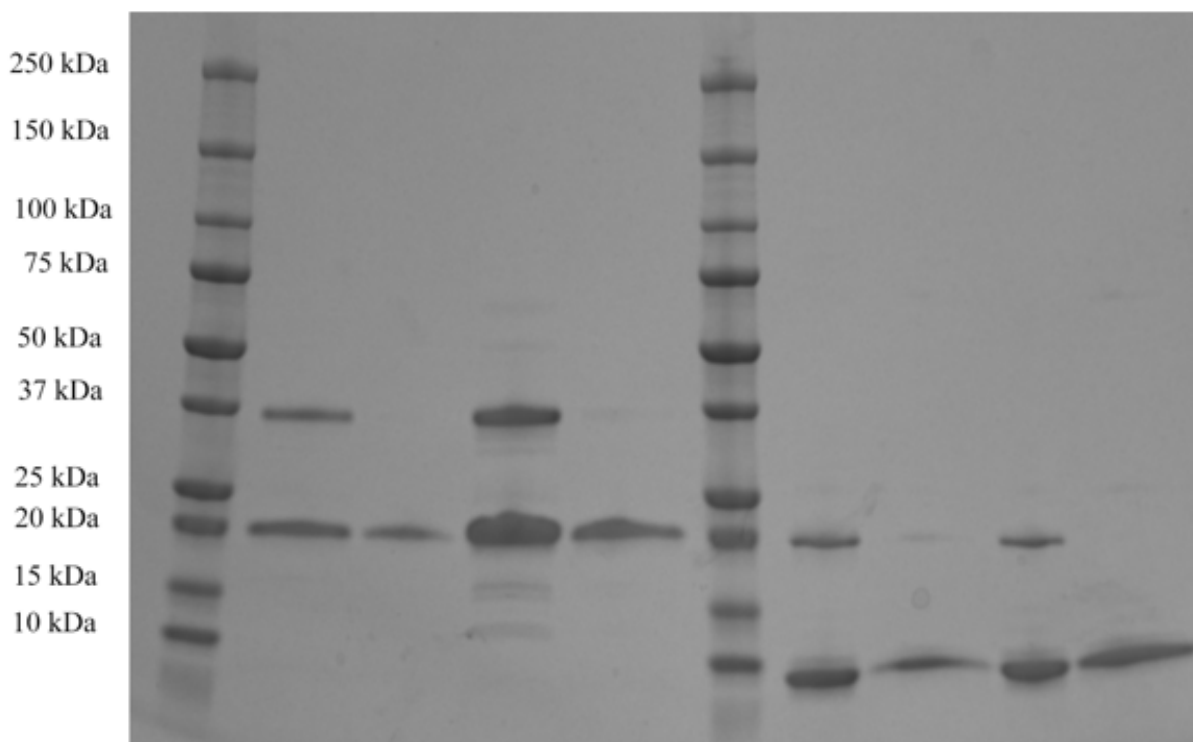

**Figure S3.** Sodium dodecyl sulfate polyacrylamide gel electrophoresis of acyl carrier proteins used in this study. Lanes: 1. Protein standards ladder; 2. *holo*-AcpP (-BME); 3. *holo*-AcpP (+BME); 4. AcpP-TNB<sup>-</sup> (-BME); 5. AcpP-TNB<sup>-</sup> (+BME); 6. Protein standards ladder; 7. *holo*-ACT ACP (-BME); 8. *holo*-ACT ACP (+BME); 9. C17S ACT ACP-TNB<sup>-</sup> (-BME); 10. ACT ACP-TNB<sup>-</sup> (+BME). The migration of *holo*-AcpP to ~ 20 kDa despite its molecular weight of ~ 10 kDa is consistent with previous observations<sup>16</sup> and is likely due to the unusual charge distribution of the protein. A second higher molecular weight band at ~ 40 kDa represents a dimer.<sup>17</sup> *Holo*-ACT ACP migrated to the expect molecular weight of ~ 10 kDa also exhibited dimer formation under non-reducing conditions.

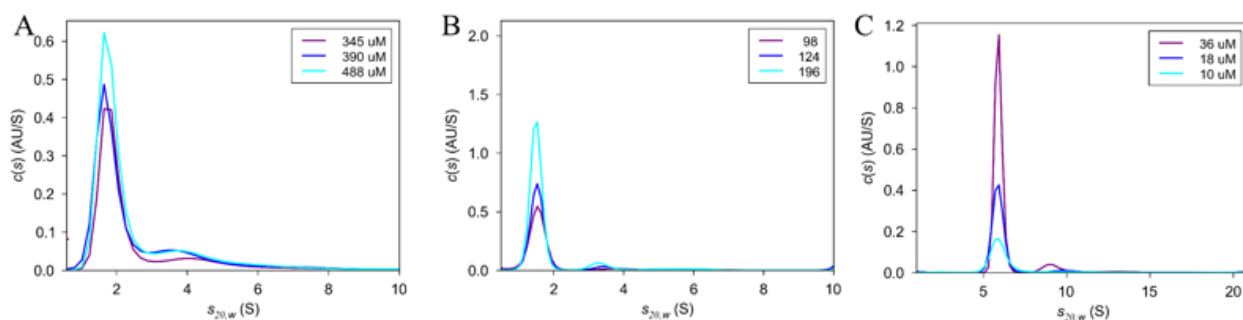

**Figure S4.** Oligomeric state of proteins used in this study. Sedimentation coefficient distributions  $c(s)$  of *holo*-AcpP (A) and *holo*-ACT ACP (B) shows a single peak at 1.7S and 1.5 S, respectively, which suggests that these proteins sediment as a monomer. The *E. coli* KS FabF sediments as a dimer in solution with an  $s$ -value centered at 5.9 S. There is no additional self-association observed with the increase of the monomer concentrations which suggests that all proteins used in this study exist in a single oligomeric state in solution under reducing conditions.

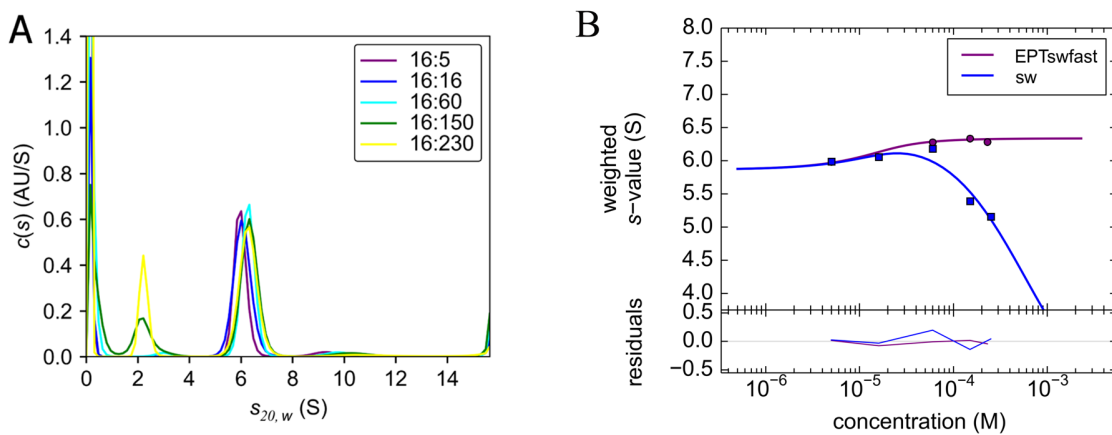

**Figure S5.** Binding constant for *holo*-AcpP (5-230  $\mu\text{M}$ ) interacting with FabF (16  $\mu\text{M}$ ) was determined from the concentration-dependent sedimentation velocity experiments. EPTswfast and sw isotherms of the weight-average sedimentation coefficient versus *holo*-AcpP concentration were best fitted to a A + B  $\leftrightarrow$  AB model with a binding constant  $k_D = 6.4 \pm 1.8 \mu\text{M}$ . The AcpP peak is centered at 2.0 S in the presence of FabF. A) Unnormalized sedimentation coefficient distribution,  $c(s)$ , of FabF titrated with *holo*-AcpP. B) Effective Particle Theory (EPT) weight-average sedimentation coefficient, EPTswfast (purple circles) and weight-average sedimentation coefficient isotherm sw (blue squares) plotted against *E. coli* ACP concentrations fitted to A + B  $\leftrightarrow$  AB model. The fitted isotherms are shown as solid lines. Bottom panel represent the residuals.

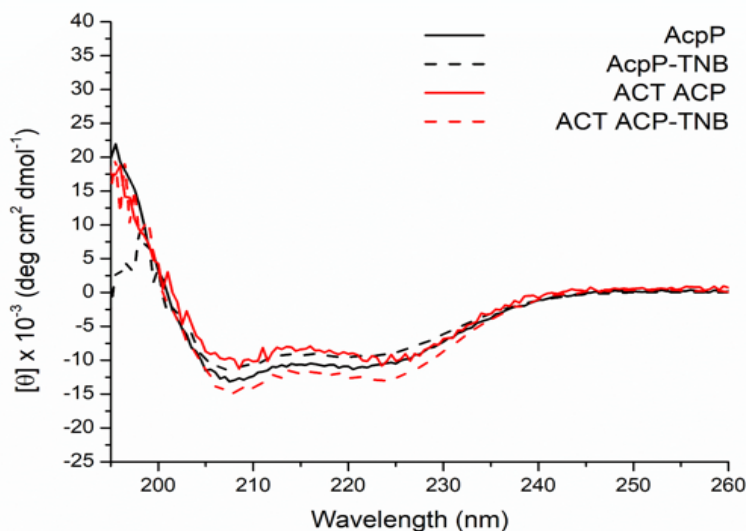

**Figure S6.** Far-UV CD data of *holo*-AcpP versus AcpP-TNB<sup>-</sup> (black) and *holo*-C17S ACT ACP versus C17S ACT ACP-TNB<sup>-</sup> (red) in phosphate buffer. The spectrum of ACPs in their *holo*- versus TNB<sup>-</sup>-labeled form are nearly identical within the signal:noise of the instrument.

QEEVTNNASFVEDLGADSLDTVELVMALEEEFDTEIPDEEAEK

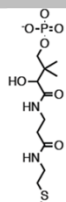

GPSISIACTSGVHNIGHAAR

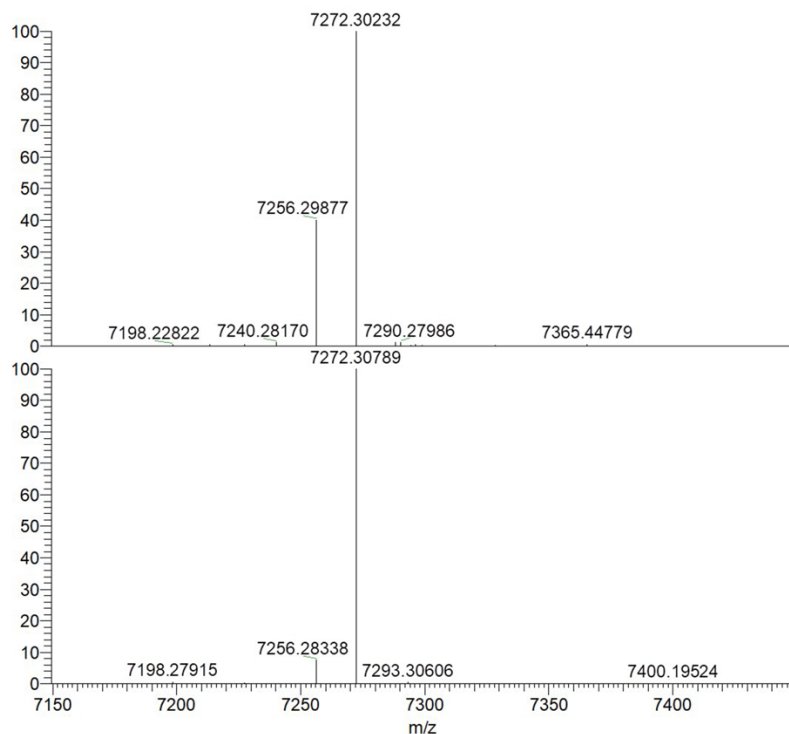

**Figure S7.** Zoomed in mass spectrum of the trypsinized sample from the excised ~75 kDa band from the SDS PAGE gel shown in Figure 3 representing a putative AcpP-FabF cross-link. Under dilute conditions, the excised band is appeared as a doublet and so both the top band (top panel) and bottom band (bottom panel) were analyzed by tandem proteolysis mass spectrometry. The  $m/z$  peak at 7256 represents the expected mass of the peptide fragment expected from a trypsinized AcpP-FabF complex linked via a disulfide bond between the thiol of the AcpP Ppant arm and the catalytic active site cysteine of FabF. The  $m/z$  peak at 7272 likely corresponds to the oxidized products at +16 Da.

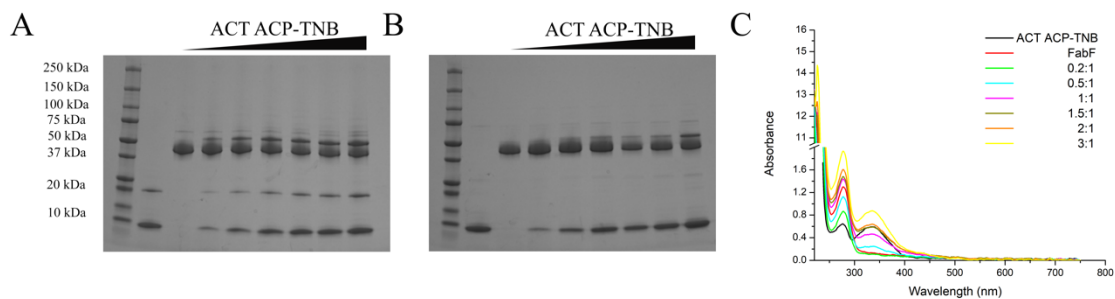

**Figure S8.** Analysis of the ACT ACP-TNB<sup>-</sup> reaction with FabF reveals that neither the ACT ACP-FabF complex nor the release of TNB<sup>2-</sup> is observed. Sodium dodecyl sulfate polyacrylamide gel electrophoresis under non-reducing (A) and reducing conditions (B) indicate that the ACT ACP-FabF complex not formed under non-reducing conditions. Lanes: 1. Protein standards ladder; 2. ACT ACP-TNB<sup>-</sup>; 3. FabF; 4. ACT ACP:FabF mixed in molar ratio of 0.2:1; 5. ACT ACP:FabF mixed in molar ratio of 0.5:1; 6. ACT ACP:FabF mixed in molar ratio of 1:1; 7. ACT ACP:FabF mixed in molar ratio of 1.5:1; 8. ACT ACP:FabF mixed in molar ratio of 2:1; and ACT ACP:FabF mixed in molar ratio of 3:1. Upon mixing ACT ACP-TNB<sup>-</sup> with FabF no release of TNB<sup>2-</sup> is observed as shown by a lack of increase in A<sub>412</sub> (C).
